# Supplementary material
Source: PubMed Central journal article supplement (PMC3283886)
Supplement: 97320630008142S1.pdf [file 97320630008142S1.pdf]

## Supplementary material:

**Table 1:** *Curcuma longa* ESTs encoding different classes of glycine rice protein's including the data about the homologous sequence, accession numbers and e-value.

| Predicted GRPs           | <i>Curcuma longa</i> contig | Signal peptide                                                                | Homologous sequence                                                           | Accession number | E.value |
|--------------------------|-----------------------------|-------------------------------------------------------------------------------|-------------------------------------------------------------------------------|------------------|---------|
| GRPs with GGGX repeats   | CL.CON.129                  | Yes                                                                           | Glycine rich cell wall structural protein, <i>Zea mays</i>                    | NM001158268      | 4e-22   |
|                          | CL.CON.183                  | Yes                                                                           | Glycine rich cell wall structural protein, <i>Zea mays</i>                    | NM001158268      | 3e-13   |
|                          | CL.CON.579                  | Yes                                                                           | Glycine rich cell wall structural protein, <i>Zea mays</i>                    | NM001158268      | 1e-19   |
|                          | CL.CON.1031                 | Yes                                                                           | <i>AtGRP6</i> , <i>Arabidopsis thaliana</i> glycine rich protein              | P27483           | 1e-29   |
|                          | CL.CON.1263                 | Yes                                                                           | <i>AtGRP6</i> , <i>Arabidopsis thaliana</i> glycine rich protein              | P27483           | 3e-32   |
|                          | CL.CON.1522                 | Yes                                                                           | <i>AtGRP6</i> , <i>Arabidopsis thaliana</i> glycine rich protein              | P27483           | 7e-09   |
|                          | CL.CON.1808                 | Yes                                                                           | <i>AtGRP6</i> , <i>Arabidopsis thaliana</i> glycine rich protein              | P27483           | 5e-63   |
|                          | CL.CON.2133                 | No                                                                            | <i>Phaseolus vulgaris</i> Glycine rich structural protein                     | P10495           | 1e-98   |
|                          | CL.CON.2672                 | No                                                                            | <i>Oryza sativa</i> chromosome 10 BAC OsJNBb0014111, translated sequence      | AC037426         | 7e-10   |
|                          | CL.CON.2913                 | Yes                                                                           | <i>OsGRP2</i> , Glycine rich protein ( <i>Oryza sativa</i> Indica group)      | CAA38315         | 9e-21   |
| CL.CON.3137              | Yes                         | <i>OsGRP2</i> , Glycine rich protein ( <i>Oryza sativa</i> Indica group)      | CAA38315                                                                      | 8e-16            |         |
| CL.CON.3381              | Yes                         | <i>OsGRP2</i> , Glycine rich protein ( <i>Oryza sativa</i> Indica group)      | CAA38315                                                                      | 9e-33            |         |
| CL.CON.3670              | Yes                         | <i>OsGRP2</i> , Glycine rich protein ( <i>Oryza sativa</i> Indica group)      | CAA38315                                                                      | 7e-03            |         |
| CL.CON.3898              | No                          | <i>Ricinus communis</i> grp1 precursor                                        | XM002524779                                                                   | 6e-72            |         |
| CL.CON.1727              | Yes                         | <i>Triticum aestivum</i> predicted protein grp                                | AK333576                                                                      | 1e-78            |         |
| GRPs with GGXXGG repeats | CL.CON.2149                 | No                                                                            | <i>Hordeum vulgare</i> Glycine rich protein <i>HvGRP1</i>                     | Z48625           | 5e-26   |
|                          | CL.CON.2897                 | No                                                                            | <i>Hordeum vulgare</i> Glycine rich protein <i>HvGRP1</i>                     | Z48625           | 2e-12   |
|                          | CL.CON.3452                 | No                                                                            | Barley <i>grp1</i>                                                            | X52580           | 4e-39   |
|                          | CL.CON.3215                 | No                                                                            | Barley <i>grp1</i>                                                            | X52580           | 4e-16   |
|                          | CL.CON.147                  | Yes                                                                           | <i>OsGRP2</i> , Glycine rich protein ( <i>Oryza sativa</i> Indica group)      | CAA38315         | 2e-39   |
|                          | CL.CON.391                  | Yes                                                                           | <i>OsGRP2</i> , Glycine rich protein ( <i>Oryza sativa</i> Indica group)      | CAA38315         | 2e-41   |
|                          | CL.CON.552                  | Yes                                                                           | <i>OsGRP2</i> , Glycine rich protein ( <i>Oryza sativa</i> Indica group)      | CAA38315         | 2e-32   |
|                          | CL.CON.813                  | No                                                                            | <i>Zea mays</i> , aluminium induced grp                                       | AAB86493         | 5e-19   |
|                          | CL.CON.923                  | No                                                                            | <i>Petunia hybrida</i> <i>grp1</i> protein                                    | X04335           | 8e-13   |
|                          | CL.CON.1154                 | No                                                                            | <i>Petunia hybrida</i> <i>grp1</i> protein                                    | X04335           | 8e-24   |
| CL.CON.1369              | No                          | <i>Zea mays</i> , aluminium induced grp                                       | AAB86493                                                                      | 6e-12            |         |
| CL.CON.1467              | No                          | <i>Zea mays</i> , aluminium induced grp                                       | AAB86493                                                                      | 5e-43            |         |
| CL.CON.1712              | Yes                         | <i>Medicago sativa</i> cold-drought regulated grp                             | L03708                                                                        | 7e-63            |         |
| GRPs with GXGX repeats   | CL.CON.1872                 | Yes                                                                           | <i>Medicago sativa</i> cold-drought regulated grp                             | L03708           | 7e-26   |
|                          | CL.CON.2199                 | No                                                                            | <i>AtGRP1</i> , glycine rich protein                                          | S47405           | 3e-14   |
|                          | CL.CON.2364                 | No                                                                            | <i>AtGRP1</i> , glycine rich protein                                          | S47405           | 3e-37   |
|                          | CL.CON.2557                 | No                                                                            | <i>Ricinus communis</i> GRP35                                                 | XM002529873      | 8e-22   |
|                          | CL.CON.2789                 | No                                                                            | <i>Ricinus communis</i> GRP35                                                 | XM002529873      | 8e-41   |
|                          | CL.CON.2932                 | No                                                                            | <i>Zea mays</i> , aluminium induced grp                                       | AAB86493         | 6e-33   |
|                          | CL.CON.3109                 | No                                                                            | <i>Medicago truncatula</i> hypothetical protein                               | XM003605901      | 5e-34   |
|                          | CL.CON.3578b                | No                                                                            | <i>AtGRP1</i> , glycine rich protein                                          | S47405           | 2e-11   |
|                          | CL.CON.3578                 | -                                                                             | <i>Brassica oleracea</i> glycine rich protein                                 | Z74892           | 6e-23   |
|                          | CL.CON.3770                 | -                                                                             | <i>Brassica napus</i> GRP22                                                   | Z15045           | 5e-89   |
| CL.CON.3917              | -                           | <i>Brassica napus</i> GRP22                                                   | Z15045                                                                        | 5e-63            |         |
| CL.CON.4012              | No                          | <i>Zea mays</i> , aluminium induced grp                                       | AAB86493                                                                      | 5e-36            |         |
| CL.CON.138               | No                          | <i>Medicago sativa</i> GRBP                                                   | AAF06329                                                                      | 3e-74            |         |
| CL.CON.209               | No                          | <i>Sorghum bicolor</i> <i>grbp1</i>                                           | AAC23220                                                                      | 2e-17            |         |
| CL.CON.447               | No                          | <i>Oryza sativa</i> Japonica group, putative RNA binding glycine rich protein | AAM19060                                                                      | 1e-32            |         |
| CL.CON.763               | No                          | ABA inducible <i>grbp</i> , <i>Zea mays</i>                                   | ACG28088                                                                      | 2e-51            |         |
| CL.CON.794               | No                          | <i>Oryza sativa</i> Japonica group, putative RNA binding glycine rich protein | AAM19060                                                                      | 2e-17            |         |
| RNA binding GRPs         | CL.CON.1078                 | No                                                                            | <i>Oryza sativa</i> Japonica group, putative RNA binding glycine rich protein | AAM19060         | 1e-23   |
|                          | CL.CON.1109                 | No                                                                            | ABA inducible <i>grbp</i> , <i>Zea mays</i>                                   | ACG28088         | 4e-34   |
|                          | CL.CON.1582                 | No                                                                            | <i>Oryza sativa</i> Japonica group, putative RNA binding glycine rich protein | AAM19060         | 1e-32   |
|                          | CL.CON.2611                 | No                                                                            | ABA inducible <i>grbp</i> , <i>Zea mays</i>                                   | ACG28088         | 2e-26   |
|                          | CL.CON.3068                 | No                                                                            | <i>Oryza sativa</i> Japonica group, putative RNA binding glycine rich protein | AAM19060         | 1e-33   |
|                          | CL.CON.4021                 | No                                                                            | <i>Triticum aestivum</i> glycine rich RNA binding protein                     | BAF30986         | 3e-21   |
